1 **Non-catalyzable denitrification intermediates**  
2 **induce nitrous oxide reduction in two purple nonsulfur bacteria**

3  
4 Breah LaSarre<sup>1,a</sup>, Ryan Morlen<sup>2</sup>, Gina C. Neumann<sup>1</sup>,  
5 Caroline S. Harwood<sup>2</sup>, and James B. McKinlay<sup>1\*</sup>  
6

7 <sup>1</sup> Department of Biology, Indiana University, Bloomington, IN  
8 <sup>2</sup> Department of Microbiology, University of Washington, Seattle, WA  
9

10 \*Corresponding author: [jmckinla@iu.edu](mailto:jmckinla@iu.edu)

11  
12 Current address:

13 <sup>a</sup> Department of Plant Pathology and Microbiology, Iowa State University, Ames, Iowa, USA

14 <sup>b</sup> Benson Hill, St. Louis MO, USA  
15  
16  
17

18 **Abstract**  
19

20 Denitrification is a form of anaerobic respiration wherein nitrate is sequentially reduced via  
21 nitrite, nitric oxide, and nitrous oxide to dinitrogen gas. The pathway has mostly been  
22 characterized in bacteria that have the complete denitrification pathway. However, each  
23 individual step can serve as a form of anaerobic respiration and many bacteria only have partial  
24 denitrification pathways. The conditions under which these partial denitrification pathways are  
25 activated have received comparatively little attention. Here we report the activity of partial  
26 denitrification pathways in two purple nonsulfur bacteria, *Rhodopseudomonas palustris* CGA009  
27 and *Rhodobacter capsulatus* SB1003. These bacteria can use one or more denitrification steps as  
28 an electron sink during phototrophic growth or to transform energy during anaerobic respiration  
29 in the dark. In each case, nitrous oxide reduction required supplementation with a non-  
30 catalyzable denitrification intermediate. Thus, bacteria that maintain partial denitrification  
31 pathways are still subject to regulation by denitrification intermediates that they cannot use.  
32

33 **Importance.** Denitrification is a form of microbial respiration wherein nitrate is converted into  
34 dinitrogen gas, a major component of Earth's atmosphere, via several nitrogen oxide  
35 intermediates. Unfortunately, denitrification of nitrate in agricultural fertilizers is often  
36 incomplete, resulting in the emission of the potent greenhouse gas, nitrous oxide. Some bacteria  
37 do not have all the steps for denitrification, but many can still reduce nitrous oxide into harmless  
38 dinitrogen gas. These partial denitrifying bacteria have received little attention. Here we  
39 characterized two partial denitrifying bacteria that are capable of nitrous oxide reduction.  
40 Surprisingly, nitrous oxide reduction was induced by denitrification intermediates that the  
41 bacteria could not respire, suggesting that regulation of nitrous oxide reduction was subject to the  
42 same cues as in complete denitrifiers. This work thus informs on how partial denitrifying  
43 bacteria can contribute to, and potentially combat, greenhouse gas emissions.  
44

## 45 Introduction

46

47 Denitrification is a multistep respiratory pathway that sequentially reduces nitrate ( $\text{NO}_3^-$ ) via  
48 nitrite ( $\text{NO}_2^-$ ), nitric oxide (NO), and nitrous oxide ( $\text{N}_2\text{O}$ ) to dinitrogen gas ( $\text{N}_2$ ) (1, 2) (Fig. 1A).  
49 While many bacteria have the complete denitrification pathway, the entire pathway is not  
50 required; any single denitrification intermediate can potentially support growth via anaerobic  
51 respiration (1, 2). Denitrification impacts the health of both humans and the planet (2).  
52 Denitrifiers in the human gut help fight pathogens and maintain vascular homeostasis through  
53 the generation of  $\text{NO}_2^-$  and NO (3). Denitrification is also important to the global nitrogen cycle,  
54 returning nitrogen to the atmosphere as  $\text{N}_2$ . Denitrifiers also play important roles in  
55 anthropogenic pollution and climate change. Although denitrifiers have the potential to convert  
56  $\text{NO}_3^-$  in runoff from agricultural fertilizers to harmless  $\text{N}_2$  before it can lead to eutrophication of  
57 water resources (4), this process often fails to run to completion, even in bacteria capable of  
58 complete denitrification. Currently, denitrification is a net generator of the potent greenhouse gas  
59  $\text{N}_2\text{O}$ , driven largely by the wide use of agricultural fertilizers (5).

60

61 Denitrifiers can be phototrophs or chemotrophs. Among the bacteria that may be capable of both  
62 phototrophic and chemotrophic denitrification are purple nonsulfur bacteria (PNSB). PNSB are  
63 perhaps the most versatile organisms ever described. PNSB can grow with either organic or  
64 inorganic electron and carbon sources, employing either phototrophy in light or aerobic or  
65 anaerobic respiration in the dark. In the dark, anaerobic respiratory pathways serve a critical role  
66 in energy transformation (i.e., oxidative phosphorylation). However, during photoheterotrophic  
67 growth, wherein light is used for energy and organic substrates are used for carbon and electrons,  
68 anaerobic respiratory pathways can help maintain electron balance (6, 7). Electron balance is a  
69 challenge to photoheterotrophic growth because more electrons are liberated from many organic  
70 substrates than can be incorporated into biomass. Excess electrons must be deposited onto an  
71 electron acceptor.  $\text{CO}_2$  is commonly used as an electron acceptor under photoheterotrophic  
72 conditions, but electron acceptors for anaerobic respiration can also serve this role.

73

74 Here we characterized the ability of the PNSB *Rhodopseudomonas palustris* CGA009 and  
75 *Rhodobacter capsulatus* SB1003, to carry out denitrification under photoheterotrophic and  
76 chemoheterotrophic conditions. In agreement with the genome sequences, we found that  
77 CGA009 could use all denitrification intermediates except for  $\text{NO}_3^-$  and SB1003 could only use  
78  $\text{N}_2\text{O}$ . However, in each case,  $\text{N}_2\text{O}$  utilization required supplementation with other denitrification  
79 intermediates, including intermediates that each organism could not reduce. Thus, although each  
80 organism only has a partial denitrification pathway, the regulatory schemes resemble those of a  
81 complete denitrifier.

82

## 83 Results

84

85 ***R. palustris* CGA009 has a partial denitrification pathway.** One of the most intensively  
86 studied PNSB is *R. palustris* CGA009 (8), yet little is known about its ability to respire  
87 anaerobically. Unlike some other model PNSB, CGA009 cannot grow via respiration with  
88 dimethylsulfoxide (9-11). However, a partial denitrification pathway was identified in the  
89 CGA009 genome (8).

90

91 We verified this partial denitrification pathway by aligning query sequences for reductases from  
 92 *Paracoccus denitrificans* PD122 against the CGA009 genome using BlastP (12). We found no  
 93 significant similarity to *nar* and *nap* nitrate reductase genes nor to *nirS* nitrite reductase.  
 94 However, we found genes with significant sequence identity to those responsible for the last  
 95 three steps of denitrification: NO<sub>2</sub><sup>-</sup> reduction, NO reduction, and N<sub>2</sub>O reduction. The gene  
 96 clusters for each of these steps were located at distinct regions in the genome (Fig. 1B). For the  
 97 first step of NO<sub>2</sub><sup>-</sup> reduction, *R. palustris* CGA009 appears to have two, possibly redundant,  
 98 copper-containing NirK NO<sub>2</sub><sup>-</sup> reductases encoded far apart on the genome. The latter two steps  
 99 of NO reduction and N<sub>2</sub>O reduction are each encoded by single gene clusters (Fig. 1B).

100

101 Several possible regulatory genes were also identified. A gene that likely encodes NnrR, a  
 102 protein that typically regulates NO<sub>2</sub><sup>-</sup>, NO, and N<sub>2</sub>O reductases in other bacteria in response to  
 103 NO (1, 13, 14), was found near the *nirK2* gene (Fig. 1B). Genes with significant sequence  
 104 identity to NasTS, which can regulate N<sub>2</sub>O reductase in response to NO<sub>3</sub><sup>-</sup> (15, 16), were found  
 105 far from the other gene clusters, upstream of a NirA-family reductase (RPA3710), which could  
 106 be involved in either nitrite or sulfite reduction.

107

108 PNSB typically use electron acceptors anaerobically to establish a proton motive force and  
 109 generate ATP when incubated in dark. When incubated in light, cells generate ATP by  
 110 photophosphorylation and use electron acceptors to enable growth on relatively reduced organic  
 111 compounds. Since *R. palustris* grows best in light, we first examined if it could use  
 112 denitrification electron acceptors when provided with butyrate, an electron-rich carbon source  
 113 that requires an electron sink for photoheterotrophic growth (7, 17).

114

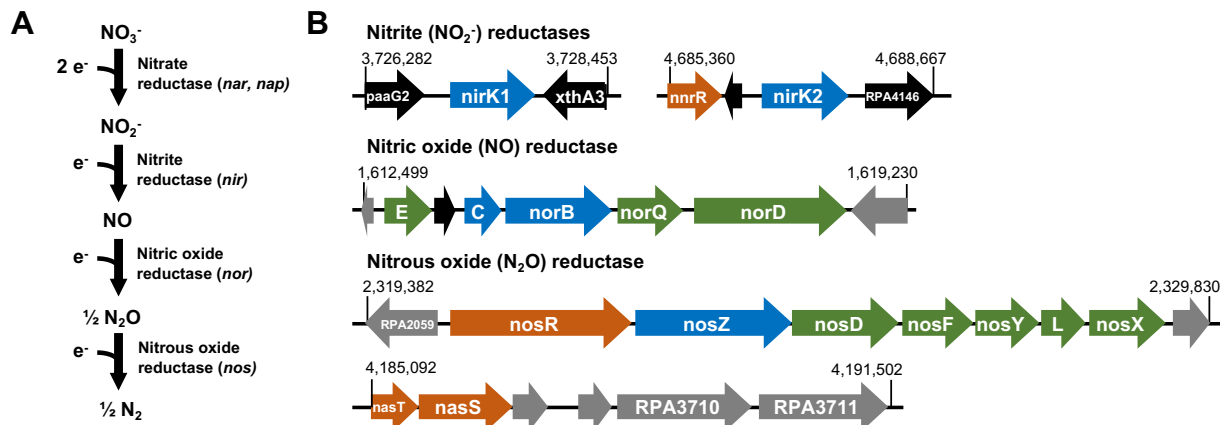

**Fig. 1. General denitrification pathway (A) and the denitrification genes found in the *R. palustris* CGA009 genome (B).** Gene products: blue, nitrogen oxide reductases; green, accessory proteins for electron transport, enzyme cofactor assembly, etc.; orange, denitrification regulators; gray, unknown function; black, likely unrelated to denitrification. Numbers indicate the chromosome nucleotide positions. Several CRP/Fnr-family transcriptional regulators with >25% sequence identity to known denitrification regulators are not shown.

115 In agreement with the genome annotation (Fig. 1B), phototrophic growth on butyrate was not  
 116 supported when supplemented with a wide range of NaNO<sub>3</sub> concentrations (Fig. 2A). However,  
 117 growth on butyrate was observed when CGA009 was provided with 1mM NaNO<sub>2</sub>, a

118 concentration that we determined to be near the toxicity limit because it caused a lag in  
119 phototrophic growth on succinate, which does not require supplementation with an electron  
120 acceptor (Fig. 2B). We did not test exogenously-added NO because it is highly toxic and would  
121 likely be impossible to add in amounts that would be practical as an electron sink to yield  
122 observable growth.

123  
124 Based on the amount of phototrophic growth observed on butyrate with NaNO<sub>2</sub>, we estimated  
125 whether NO<sub>2</sub><sup>-</sup> was reduced completely to N<sub>2</sub>. From our previous work, we estimated that ~6 mM  
126 bicarbonate (HCO<sub>3</sub><sup>-</sup>) is consumed for an increase in cell density of ~1 OD<sub>660</sub> during phototrophic  
127 growth on butyrate with NaHCO<sub>3</sub> (17). Whereas HCO<sub>3</sub><sup>-</sup> can serve as a sink for two electrons,  
128 each molecule of NO<sub>2</sub><sup>-</sup> could serve as a sink for three electrons if NO<sub>2</sub><sup>-</sup> is reduced sequentially to  
129 N<sub>2</sub> but only one electron if NO<sub>2</sub><sup>-</sup> is only reduced to NO (Fig. 1A). Based on this stoichiometry,  
130 we predicted a cell density of ~0.25 OD<sub>660</sub> during phototrophic growth with butyrate plus 1 mM  
131 NaNO<sub>2</sub> assuming that all the NaNO<sub>2</sub> is reduced to N<sub>2</sub>. Close to our prediction, we observed a  
132 final OD<sub>660</sub> of 0.28 ± 0.00 (n=3) (Fig. 2A). Thus, we deduce that the latter three reductases for  
133 denitrification (Fig. 1A) are all active in CGA009. However, when CGA009 was provided with a  
134 100% headspace of N<sub>2</sub>O, no growth was observed within 15 days (Fig. 2A), suggesting that N<sub>2</sub>O  
135 alone cannot activate N<sub>2</sub>O reductase.

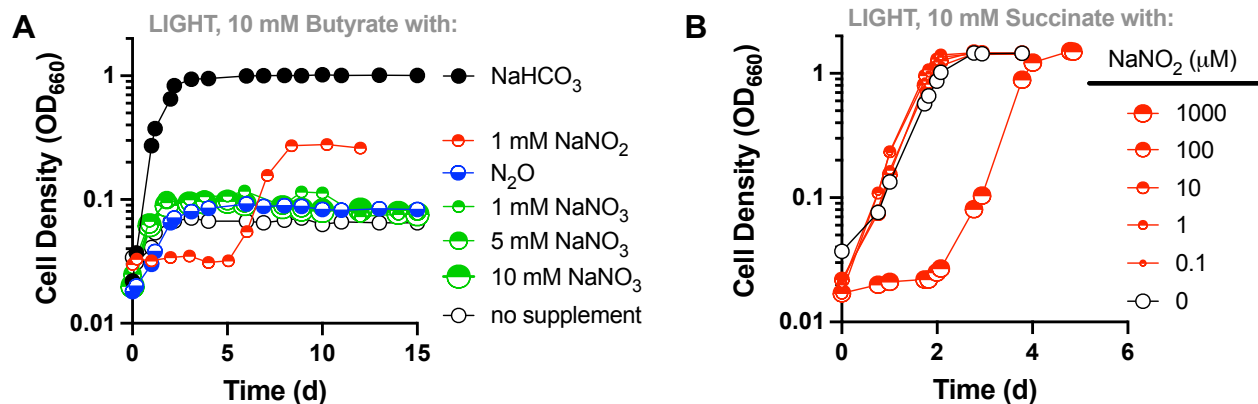

**Fig. 2. NaNO<sub>2</sub> supports phototrophic growth of CGA009 on butyrate within toxicity limits.** **A.** Phototrophic growth curves with butyrate and various potential electron acceptors. **B.** Phototrophic growth curves on succinate, a condition that readily supports growth without supplementation with an electron acceptor, with various concentrations of NaNO<sub>2</sub> to identify the toxicity limit. **A, B.** Plots are single representatives of similar trends observed for three biological replicates except for those exploring different NaNO<sub>2</sub> and NaNO<sub>3</sub> concentrations. Cultures had a 100% Ar headspace unless N<sub>2</sub>O is indicated (100% N<sub>2</sub>O).

136  
137 **N<sub>2</sub>O reduction by CGA009 is induced by NO<sub>2</sub><sup>-</sup> and NO<sub>3</sub><sup>-</sup> during photoheterotrophic growth.**  
138 In some bacteria, denitrification intermediates other than N<sub>2</sub>O enhance N<sub>2</sub>O reduction or are  
139 required to induce N<sub>2</sub>O reduction (1, 2, 14, 18, 19). NO<sub>2</sub><sup>-</sup>-induction of N<sub>2</sub>O reductase can be  
140 mediated by NnrR, though NO<sub>2</sub><sup>-</sup> might first need to be converted to NO (14) (Fig. 1B). NO<sub>3</sub><sup>-</sup>-  
141 induction of N<sub>2</sub>O reductase can be mediated by NasTS (15, 16) (Fig. 1B). We thus tested  
142 whether NaNO<sub>2</sub> or NaNO<sub>3</sub> could induce growth with N<sub>2</sub>O. Micromolar amounts of NaNO<sub>2</sub>

143 stimulated growth with N<sub>2</sub>O. NaNO<sub>2</sub> at 100 μM caused a 4-day lag in growth, probably because  
144 it was toxic at this concentration (Fig. 3A). Final cell densities increased with the amount of  
145 NaNO<sub>2</sub> added (Fig. 3A). We conclude that the higher final cell density when N<sub>2</sub>O was provided  
146 along with 100 μM NaNO<sub>2</sub> is due to the use of N<sub>2</sub>O as an electron acceptor rather than NO<sub>2</sub><sup>-</sup>  
147 because growth trends with 100 μM NaNO<sub>2</sub> alone were much lower (Fig. 3A vs Fig. 2A). Thus,  
148 we speculate that exhaustion of NO<sub>2</sub><sup>-</sup> as an electron acceptor eliminates induction of N<sub>2</sub>O  
149 reductase, and thus growth on N<sub>2</sub>O lasts only as long as the pool of NaNO<sub>2</sub>.

150

151 Despite lacking NO<sub>3</sub><sup>-</sup> reductase, NaNO<sub>3</sub> also induced phototrophic growth on butyrate with N<sub>2</sub>O  
152 (Fig. 3B). Similar growth trends were observed between 1 μM to 10 mM NaNO<sub>3</sub>. Slower growth  
153 and a lower final cell density was observed at NaNO<sub>3</sub> concentrations of 0.1 μM or lower (Fig.  
154 3B). The fact that 1 μM NaNO<sub>3</sub> resulted in similar growth trends as 10 mM NaNO<sub>3</sub> suggests that  
155 NO<sub>3</sub><sup>-</sup> is not being reduced and that NaNO<sub>3</sub> is relatively non-toxic. Thus, NaNO<sub>3</sub> is potentially  
156 useful as a stable inducer of N<sub>2</sub>O reductase compared to NaNO<sub>2</sub>.

157

158 Initial phototrophic growth on butyrate with NaNO<sub>3</sub> was faster than that with bicarbonate  
159 (doubling time ± SD = 13 ± 3 vs 17 ± 2 h, respectively). However, growth with NaNO<sub>3</sub>  
160 transitioned to slow growth at a cell density of ~0.2 – 0.3 OD<sub>660</sub> and reached a lower final cell  
161 density than with bicarbonate (ΔOD<sub>660</sub> ± SD = 0.72 ± 0.05 vs 0.99 ± 0.02, respectively). Flushing  
162 the headspace with N<sub>2</sub>O after the transition did not restore the initial growth rate (data not  
163 shown).

164

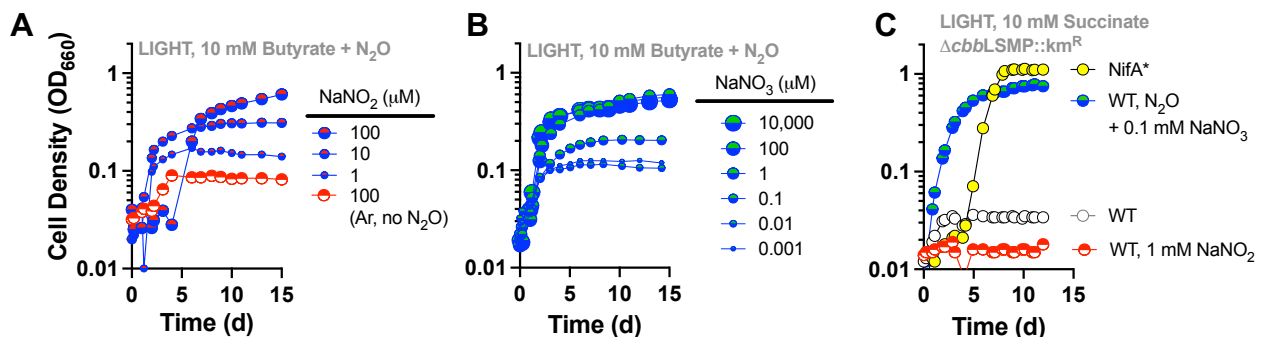

**Fig. 3. NaNO<sub>2</sub> and NaNO<sub>3</sub> induce phototrophic N<sub>2</sub>O utilization by CGA009. A.**

Phototrophic growth curves with butyrate +/- N<sub>2</sub>O and different concentrations of NaNO<sub>2</sub>. The Ar, no N<sub>2</sub>O control had a 100% argon headspace in place of N<sub>2</sub>O. **B.** Phototrophic growth curves with butyrate + N<sub>2</sub>O and different concentrations of NaNO<sub>3</sub>. **C.** Phototrophic growth curves of Calvin cycle deletion mutants with succinate. Cultures had a 100% Ar headspace unless N<sub>2</sub>O is indicated (100% N<sub>2</sub>O). **A-C.** Single representatives of similar trends observed for three biological replicates are shown for each condition except for those exploring different

165

166 We also tested whether N<sub>2</sub>O reduction could serve as an electron sink to rescue *R. palustris*  
167 growth when the CO<sub>2</sub>-fixing Calvin cycle is genetically disrupted. *R. palustris* Calvin cycle  
168 mutants cannot grow phototrophically even on relatively oxidized carbon sources like succinate  
169 unless an alternative electron sink is provided (6). For example, NifA\* mutations rescue Calvin  
170 cycle mutants by disposing of excess electrons as H<sub>2</sub> gas via constitutively active nitrogenase (6,  
171 17, 20). Here we found that NaNO<sub>3</sub> plus N<sub>2</sub>O could also rescue an *R. palustris* Calvin cycle



172 mutant during phototrophic growth on succinate (Fig. 3C). N<sub>2</sub>O reduction resulted in more  
173 immediate growth than a NifA\* positive control. However, growth eventually slowed and the  
174 culture reached a lower final cell density than the NifA\* control, similar to what was observed  
175 during growth on butyrate compared to a bicarbonate-containing control (Fig. 3C vs 2A). Gas  
176 chromatographic analysis of headspace samples confirmed that growth of all cultures with  
177 NaNO<sub>3</sub> plus N<sub>2</sub>O was not due to spontaneous mutations enabling H<sub>2</sub> production (data not  
178 shown).

179

180 We wondered whether NaNO<sub>3</sub> might also improve growth with NO<sub>2</sub><sup>-</sup>, perhaps by stimulating  
181 NO<sub>2</sub><sup>-</sup> reductase activity. However, adding NaNO<sub>3</sub> did not affect photoheterotrophic growth  
182 trends on butyrate with 1 mM NaNO<sub>2</sub>, even when NaNO<sub>3</sub> was also added to starter cultures as a  
183 possible ‘pre-inducing’ condition (Fig. 4A). The same strategy also did not decrease the lag  
184 phase during phototrophic growth on succinate with 1 mM NaNO<sub>2</sub>.

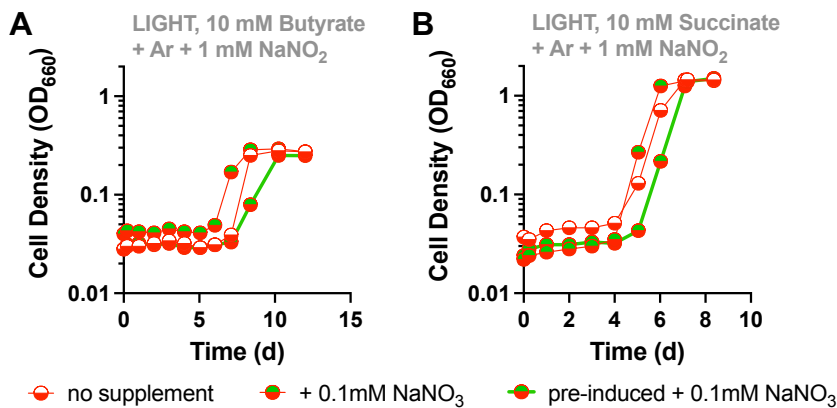

**Fig. 4. NaNO<sub>3</sub> does not improve growth trends when NO<sub>2</sub><sup>-</sup> is present as an essential electron sink (A) or as a toxic compound (B).** Single representatives of similar trends observed for three biological replicates are shown for each condition.

185

186 **N<sub>2</sub>O supports anaerobic respiration by CGA009 in the dark when induced with NaNO<sub>3</sub>.**

187 Without access to light, many PNSB can transform energy via anaerobic respiration. We tested  
188 whether NaNO<sub>2</sub> or N<sub>2</sub>O could support anaerobic respiration by CGA009 in the dark. Acetate and  
189 butyrate were chosen as two carbon sources that are metabolized via similar pathways but  
190 present the cell with different amounts of electrons (17). Unlike phototrophic conditions,  
191 supplementation with either 0.3 or 1 mM NaNO<sub>2</sub> did not lead to observable growth in the dark  
192 with either acetate or butyrate within at least 15 days. However, N<sub>2</sub>O plus NaNO<sub>3</sub> supported  
193 growth with either acetate or butyrate (Fig. 5). Growth was slower with acetate than with  
194 butyrate (doubling time ± SD = 88 ± 2 h vs 51 ± 3, respectively).

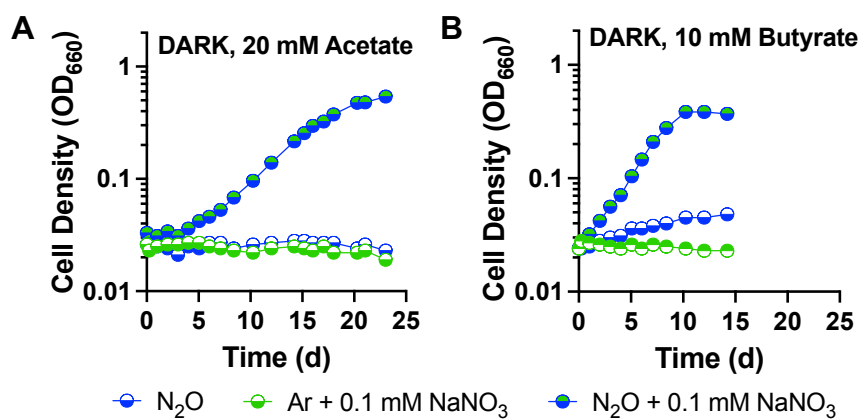

**Fig. 5. Anaerobic respiration by CGA009 with N<sub>2</sub>O in the dark with acetate (A) or butyrate (B).** Single representatives of similar trends observed for three biological replicates are shown for each condition. Cultures had a 100% Ar headspace or 100% N<sub>2</sub>O headspace as indicated.

195

196

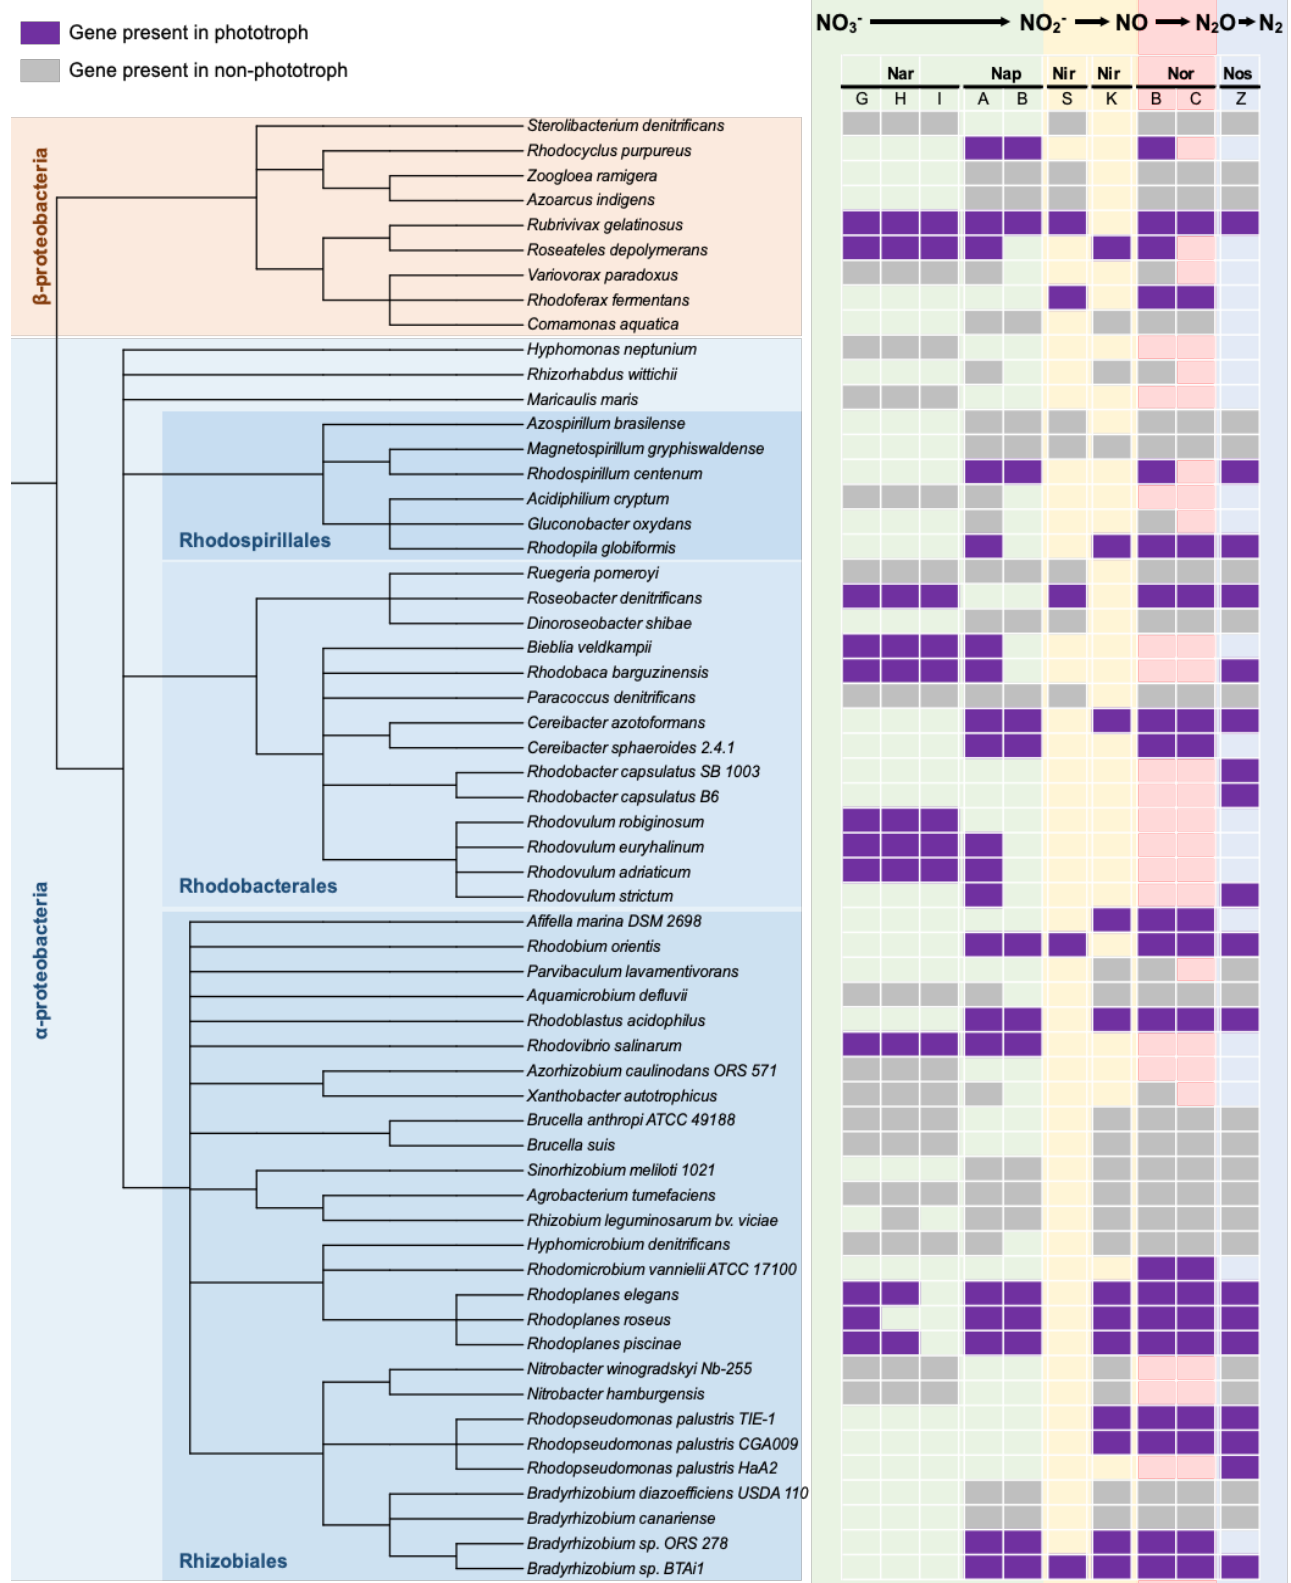

**Fig. 6. Denitrification reductase genes in PNSB and related non-phototrophs.** A gene was considered present if a predicted gene product exhibited >25% amino acid identity over 50% of its length relative to the query sequence. All subunits for a given enzyme are needed for the activity of a given reductase. The phylogenetic tree was built using PhyloT v2 (phylot.biobyte.de) based on NCBI taxonomy.



197 ***R. capsulatus* SB 1003 requires NO<sub>2</sub><sup>-</sup> to induce growth on N<sub>2</sub>O.** We wondered if induction of  
 198 N<sub>2</sub>O reductase by non-catalyzable denitrification intermediates occurs in other bacteria with  
 199 partial denitrification pathways. We thus surveyed the genomes of various PNSB and non-  
 200 phototrophic relatives using BlastP analysis with the same query denitrification reductase genes  
 201 as for *R. palustris* in Figure 1 (Fig. 6). *R. capsulatus* SB 1003 stood out as an easily cultivatable  
 202 and phylogenetically distant PNSB that has N<sub>2</sub>O reductase but no other denitrification genes  
 203 (Fig. 6 and 7A). In agreement with the genome annotation, SB 1003 phototrophic growth on  
 204 butyrate was not supported by NaNO<sub>3</sub> (Fig. 7B). NaNO<sub>2</sub> also did not support growth, though SB  
 205 1003 was sensitive to NaNO<sub>2</sub> concentrations > 0.5 mM (Fig. 7C), which would likely be needed  
 206 to see a clear OD increase. Similar to CGA009, N<sub>2</sub>O alone did not lead to phototrophic growth  
 207 on butyrate. However, supplementation with 100 μM NaNO<sub>2</sub>, but not NaNO<sub>3</sub>, stimulated  
 208 phototrophic growth on butyrate with N<sub>2</sub>O (Fig. 7B). The same was true of growth in the dark on  
 209 succinate (Fig. 7D), a condition chosen to test whether the same regulatory trend held true during  
 210 anaerobic N<sub>2</sub>O respiration in the dark.  
 211

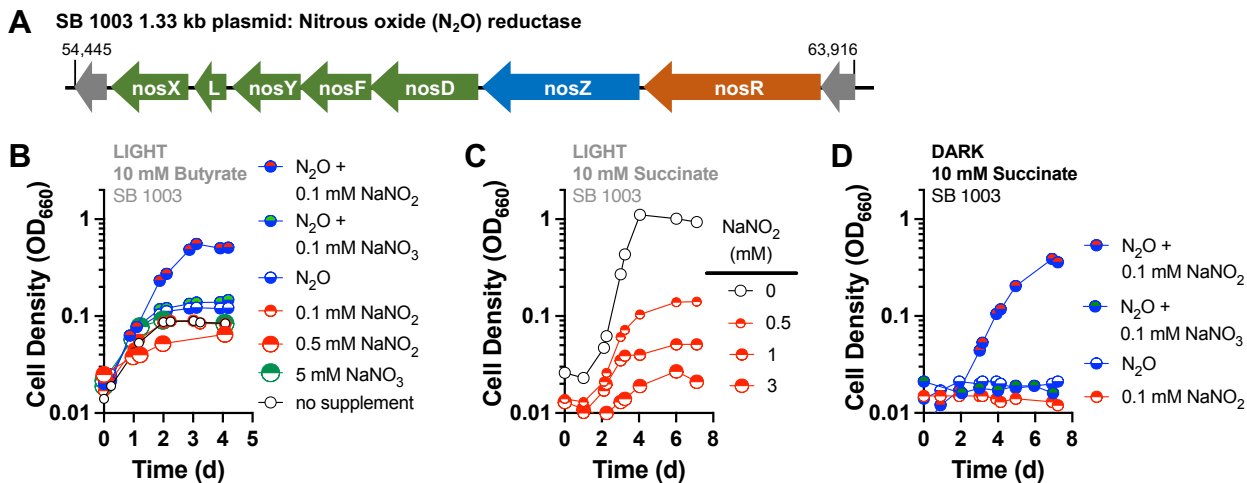

**Fig. 7. Activation of the single *R. capsulatus* SB 1003 denitrification step, N<sub>2</sub>O reduction, requires NO<sub>2</sub><sup>-</sup>.** **A.** SB 1003 N<sub>2</sub>O reductase genes (*nos*) are on a plasmid. A possible regulator, NnrR, is encoded on the chromosome. Gene products: blue, N<sub>2</sub>O reductase; green, accessory proteins for electron transport, enzyme cofactor assembly, etc.; orange, denitrification regulators; gray, unknown function. Numbers indicate nucleotide positions. **B.** Phototrophic growth with butyrate and various denitrification intermediates. **C.** Phototrophic growth with succinate and various NaNO<sub>2</sub> concentrations to determine the toxicity limit. **D.** Chemotrophic growth with succinate with N<sub>2</sub>O as an electron acceptor for anaerobic respiration. **B-D.** Single representatives of similar trends observed for three biological replicates are shown for each condition except for the test of NaNO<sub>2</sub> toxicity in panel C. Cultures had a 100% Ar headspace unless N<sub>2</sub>O is indicated (100% N<sub>2</sub>O).

## 213 Discussion

214  
215 We determined that non-catalyzable denitrification intermediates were required to induce the  
216 final denitrification step of N<sub>2</sub>O reduction in two phylogenetically distant PNSB. This regulatory  
217 response to non-catalyzable intermediates could be the result of gene loss from an ancestor that  
218 had a complete denitrification pathway; that is, reductase genes have been lost but the regulatory  
219 network remains. For CGA009, gene loss seems more plausible than an alternative scenario of  
220 gene gain through horizontal gene transfer given the number of genes present for both catalysis  
221 and regulation (Fig. 1B). The spectrum of denitrification activities and gene content also varies  
222 for different *R. palustris* strains (21-23) (Fig. 6). However, a combination of gene loss and gene  
223 gain, or even gene duplication could have shaped the CGA009 denitrification inventory. Gene  
224 duplication could explain the existence of two nitrite reductase genes (Fig. 1B), that share 82%  
225 nucleotide sequence identity.

226  
227 SB 1003 could be an example of gene gain given that the N<sub>2</sub>O reductase gene cluster is encoded  
228 on a plasmid. How this cluster is regulated in response to NO<sub>2</sub><sup>-</sup> remains unclear. Others have  
229 reported that unsequenced *R. capsulatus* strains reduce NO<sub>3</sub><sup>-</sup> (7), and one isolate carried out  
230 complete denitrification (24). If these strains are truly close relatives of SB 1003, then perhaps a  
231 common ancestor was capable of denitrification and some regulatory genes were maintained in  
232 SB 1003. Alternatively, an unrelated regulatory feature might have evolved to control N<sub>2</sub>O  
233 reductase activity (25).

234  
235 The requirement of NO<sub>2</sub><sup>-</sup>, but not NO<sub>3</sub><sup>-</sup>, for SB 1003 growth with N<sub>2</sub>O is unexpected. To the best  
236 of our knowledge, there are no clear examples of NO<sub>2</sub><sup>-</sup> regulation of N<sub>2</sub>O reductase. SB 1003 has  
237 several CRP/Fnr-family transcriptional regulator genes encoded in its chromosome with >25%  
238 amino acid identity to denitrification regulators like *P. denitrificans* FnrP (RCAP\_rcc02493;  
239 74% identity) and *Pseudomonas aeruginosa* Dnr/NnrR (RCAP\_rcc00107; 36% identity) (Fig.  
240 7A). However, these regulators respond to NO. It is possible that some of the NO<sub>2</sub><sup>-</sup> we added was  
241 converted to NO by an unknown, and perhaps non-specific, enzyme activity and then NO  
242 activated N<sub>2</sub>O reductase via the NnrR regulator (26).

243  
244 One can also question why bacteria would lack a complete denitrification pathway.  
245 Denitrification genes could be lost if their activity is neutral or detrimental to fitness. NO<sub>3</sub><sup>-</sup>  
246 reduction by Nar could be detrimental as the only denitrification enzyme with a cytoplasmic  
247 active site; the rest of the enzymes operate in the periplasm (1, 2, 27). As such, generation of  
248 toxic NO<sub>2</sub><sup>-</sup> in the cytoplasm by Nar could lead to a selective disadvantage. Operating Nar during  
249 phototrophic generation of a proton motive force could also be more susceptible to backpressure  
250 (22) than the periplasmic denitrification steps. Nar eliminates protons in the cytoplasm, thus  
251 contributing to the proton gradient, whereas the other denitrification steps eliminate protons in  
252 the periplasm, detracting from the gradient (27). Thus, light-driven proton translocation could  
253 impose a thermodynamic impediment on Nar and thereby slow growth if, for example, the  
254 organism is using denitrification to dispose of electrons. However, these explanations do not  
255 explain why a phototroph would not have Nap, which reduces NO<sub>3</sub><sup>-</sup> in the periplasm. Our survey  
256 revealed several examples of Nar or Nap in PNSB (Fig. 6).

257

258 Loss of denitrification genes could also be neutral or advantageous when within a community of  
259 denitrifiers. Such scenarios are predicted by the Black Queen Hypothesis, wherein a gene  
260 function that benefits other community members leads to loss of that function in a subset of  
261 beneficiary community members (28). For example, if denitrification intermediates are reliably  
262 generated by a neighbor and not all steps are needed for energy transformation and/or electron  
263 balance, then it could be beneficial to lose other steps rather than incur the cost of synthesizing  
264 the associated enzymes. Dispensing of  $\text{NO}_2^-$  and NO reductases could also be beneficial if  $\text{NO}_2^-$   
265 and NO are reliably removed by other community members. Membership within a denitrifying  
266 community could also explain why non-catalyzable intermediates stimulate  $\text{N}_2\text{O}$  reduction, as  
267 there would be little pressure to evolve responses to  $\text{N}_2\text{O}$  alone if  $\text{N}_2\text{O}$  is always found with other  
268 intermediates of denitrification.

269  
270 Partial denitrification pathways are both variable and widespread in PNSB (Fig. 6). This trend  
271 could very well be true outside of PNSB and their close relatives. Despite decades of  
272 investigation into the activity and regulation of denitrification, there has been comparatively little  
273 research on partial denitrification pathways (2). Further investigation into the regulation of  
274 partial denitrification pathways is needed, as is their potential impact on  $\text{N}_2\text{O}$  greenhouse gas  
275 emissions from agricultural fertilizers.

## 276 277 **Methods.**

278  
279 **Strains.** *R. palustris* CGA009 is a chloramphenicol-resistant type strain derived from CGA001  
280 (8). The Calvin cycle mutant  $\Delta cbbLSMP::km^R$  (CGA4008) was constructed by deleting *cbbLS*,  
281 encoding ribulose-1,5-bisphosphate carboxylase (Rubisco) form I, in a previously described  
282 mutant lacking Rubisco form II ( $\Delta cbbM$ ; CGA668; (20)) via introduction of the suicide vector  
283 pJQ $\Delta cbbLS$  (29) by conjugation with *E. coli* S17 as described (29, 30). The gene encoding  
284 phosphoribulokinase, *cbbP*, was then deleted in the resulting strain ( $\Delta cbbLSM$ ; CGA4006) by  
285 introducing the suicide vector pJQ $\Delta cbbP::km^f$  (29), as above, to generate the  $\Delta cbbLSMP::km^R$   
286 strain, CGA4008. All strain genotypes were verified by PCR and Sanger sequencing. The NifA\*  
287 derivative of CGA4008 with constitutive nitrogenase activity/ $\text{H}_2$  production (CGA4011) was  
288 described previously (29). The elimination of three genes unique to the Calvin cycle greatly  
289 decreases the odds of enriching for suppressor mutations. *R. capsulatus* SB1003 was provided  
290 courtesy of Carl Bauer (Indiana University).

291  
292 **Growth conditions.** Strains were routinely cultivated in 10 ml photosynthetic medium (PM)  
293 (31) in 27-ml anaerobic test tubes. PM was made anaerobic by bubbling tubes with 100% Ar  
294 then sealing with rubber stoppers and aluminum crimps prior to autoclaving. After autoclaving,  
295 tubes were supplemented with either 20 mM sodium acetate, 10 mM sodium butyrate, or 10 mM  
296 sodium succinate from 100X anaerobic stock solutions. SB1003 cultures were also supplemented  
297 with 0.1  $\mu\text{g/ml}$  nicotinic acid, 0.2  $\mu\text{g/ml}$  riboflavin, and 1.3  $\mu\text{g/ml}$  thiamine-HCl.  $\text{NaNO}_2$  or  
298  $\text{NaNO}_3$  were added as indicated in the text. For conditions with  $\text{N}_2\text{O}$ , tubes were flushed with  
299 100%  $\text{N}_2\text{O}$  through a 0.45  $\mu\text{m}$  syringe filter and needle after all liquid supplements were added.  
300 A second needle was used for off-gassing. Cultures were inoculated with a 1% inoculum from  
301 starter cultures grown phototrophically in anaerobic PM with succinate, except for the  
302 experiment testing Calvin cycle mutants (Fig. 3C) in which all starter cultures were grown  
303 aerobically in 3 ml PM with succinate in the dark. Aerobic conditions were chosen for these

304 starter cultures to accommodate the  $\Delta cbbLSMP::km^R$  mutant (CGA4008) that requires an  
305 electron sink to grow.

306  
307 **Analytical procedures.** Culture growth was monitored via optical density at 660 nm (OD<sub>660</sub>)  
308 using a Genesys 20 spectrophotometer (Thermo-Fisher, Waltham, MA, USA) directly in culture  
309 tubes without sampling. Specific growth rates were calculated using OD<sub>660</sub> values between 0.1  
310 and 1.0 where cell density and OD are linearly correlated. H<sub>2</sub> was sampled from culture  
311 headspace using a gas-tight syringe and analysed using a Shimadzu GC-2014 gas chromatograph  
312 as described (32).

313  
314 **Bioinformatics.** Denitrification reductase gene inventories were determined using NCBI's  
315 protein BLAST (12) to search for query sequences from *P. denitrificans* PD122 (Accession  
316 numbers) NarG (GEK69895), NarH (CAA81215), NarI (CAA81217), NapA (CAA85346),  
317 NapB (GEK66554), NirS (GEK68816), NirK (GEC49504), NorB (BAA32546), NorC  
318 (BAA32545), and NosZ (GEK69878). Denitrification regulatory genes inventories were  
319 similarly determined using query sequences from *P. denitrificans* PD122 FnrP (WP\_041529894  
320 (33)) and Nnr (WP\_041529894 (33)), *B. japonicum* USDA110 NasT (BAC49838) and NasS  
321 (BAC49837), and *P. aeruginosa* PAO1 Dnr/NnrR (BAA08744). The phylogenetic tree was built  
322 using PhyloT v2 (phylo.t.biobyte.de) based on NCBI taxonomy and visualized using iTOL v6  
323 (itol.embl.de).

324  
325 **Acknowledgements**

326  
327 This work was supported in part by a National Science Foundation CAREER  
328 award (MCB-1749489NSF), the Division of Chemical Sciences, Geosciences, and Biosciences,  
329 Office of Basic Energy Sciences, U.S. Department of Energy (DOE), through Grant DE-FG02-  
330 05ER15707, the Office of Science (BER), U.S. Department of Energy, through Grant DE-FG02-  
331 07ER64482, and the Indiana University College of Arts and Sciences.

332  
333 **References**

- 334  
335 1. Zumft WG. 1997. Cell biology and molecular basis of denitrification. *Microbiol Mol Biol*  
336 *Rev* 61:533-616.  
337 2. Zumft WG, Kroneck PM. 2007. Respiratory transformation of nitrous oxide (N<sub>2</sub>O) to  
338 dinitrogen by Bacteria and Archaea. *Adv Microb Physiol* 52:107-227.  
339 3. Lundberg JO, Weitzberg E, Cole JA, Benjamin N. 2004. Nitrate, bacteria and human  
340 health. *Nat Rev Microbiol* 2:593-602.  
341 4. Gold A, Addy K, David M, Schipper L, Needleman B. 2014. Artificial sinks:  
342 opportunities and challenges for managing offsite nitrogen losses. *J Contemp Water Res*  
343 *Educ* 151:9-19.  
344 5. Barnard R, Leadly P, Hungate B. 2005. Global change, nitrification, and denitrification:  
345 A review. *Global Biogeochem Cycles* 19:327-338.  
346 6. McCully AL, Onyeziri MC, LaSarre B, Gliessman JR, McKinlay JB. 2020. Reductive  
347 tricarboxylic acid cycle enzymes and reductive amino acid synthesis pathways contribute  
348 to electron balance in a *Rhodospirillum rubrum* Calvin-cycle mutant. *Microbiol* 166:199-  
349 211.

- 350 7. Richardson DJ, King GF, Kelly DJ, McEwan AG, Ferguson SJ, Jackson JB. 1998. The  
351 role of auxiliary oxidants in maintaining redox balance during phototrophic growth of  
352 *Rhodobacter capsulatus* on propionate or butyrate. Arch Microbiol 150:131-7.
- 353 8. Larimer FW, Chain P, Hauser L, Lamerdin J, Malfatti S, Do L, Land ML, Pelletier DA,  
354 Beatty JT, Lang AS, Tabita FR, Gibson JL, Hanson TE, Bobst C, Torres JLTy, Peres C,  
355 Harrison FH, Gibson J, Harwood CS. 2004. Complete genome sequence of the  
356 metabolically versatile photosynthetic bacterium *Rhodospseudomonas palustris*. Nat  
357 Biotechnol 22:55-61.
- 358 9. Luxem KE, Kraepiel AML, Zhang L, Waldbauer JR, Zhang X. 2022. Corrigendum.  
359 Carbon substrate re-orders relative growth of a bacterium using Mo-, V-, or Fe-  
360 nitrogenase for nitrogen fixation. Environ Microbiol 24:2170-2176.
- 361 10. Luxem KE, Kraepiel AML, Zhang L, Waldbauer JR, Zhang X. 2020. Carbon substrate  
362 re-orders relative growth of a bacterium using Mo-, V-, or Fe-nitrogenase for nitrogen  
363 fixation. Environ Microbiol 22:1397-1408.
- 364 11. Oda Y, Larimer FW, Chain PSG, Malfatti S, Shin MV, Vergez LM, Hauser L, Land ML,  
365 Braatsch S, Beatty JT, Pelletier DA, Schaefer AL, Harwood CS. 2008. Multiple genome  
366 sequences reveal adaptations of a phototrophic bacterium to sediment  
367 microenvironments. Proc Natl Acad Sci USA 105:18543-18548.
- 368 12. Altschul SF, Gish W, Miller W, Myers EW, Lipman DJ. 1990. Basic local alignment  
369 search tool. J Mol Biol 215:403-10.
- 370 13. Gaimster H, Alston M, Richardson DJ, Gates AJ, G R. 2018. Transcriptional and  
371 environmental control of bacterial denitrification and N<sub>2</sub>O emissions. FEMS Microbiol  
372 Lett 365:fnx277.
- 373 14. Arai H, Mizutani M, Igarashi Y. 2003. Transcriptional regulation of the nos genes for  
374 nitrous oxide reductase in *Pseudomonas aeruginosa*. Microbiol 149:29-36.
- 375 15. Sanchez C, Itakura M, Okubo T, Matsumoto T, Yoshikawa H, Gotoh A, Hidaka M,  
376 Uchida T, Minamisawa K. 2014. The nitrate-sensing NasST system regulates nitrous  
377 oxide reductase and periplasmic nitrate reductase in *Bradyrhizobium japonicum*. Environ  
378 Microbiol 16:3263-74.
- 379 16. Sanchez C, Mitsui H, Minamisawa K. 2017. Regulation of nitrous oxide reductase genes  
380 by NasT-mediated transcription antitermination in *Bradyrhizobium diazoefficiens*.  
381 Environ Microbiol Rep 9:389-396.
- 382 17. McKinlay JB, Harwood CS. 2011. Calvin cycle flux, pathway constraints, and substrate  
383 oxidation state together determine the H<sub>2</sub> biofuel yield in photoheterotrophic bacteria.  
384 mBio 2:e00323-10.
- 385 18. Härtig E, Zumft WG. 1999. Kinetics of *nirS* expression (cytochrome cd1 nitrite  
386 reductase) in *Pseudomonas stutzeri* during the transition from aerobic respiration to  
387 denitrification: evidence for a denitrification-specific nitrate- and nitrite-responsive  
388 regulatory system. J Bacteriol 181:161-6.
- 389 19. Sabaty M, Schwintner C, Cahors S, Richaud P, Vermeglio A. 1999. Nitrite and nitrous  
390 oxide reductase regulation by nitrogen oxides in *Rhodobacter sphaeroides* f. sp.  
391 denitrificans IL106. J Bacteriol 181:6028-32.
- 392 20. McKinlay JB, Harwood CS. 2010. Carbon dioxide fixation as a central redox cofactor  
393 recycling mechanism in bacteria. Proc Natl Acad Sci USA 107:11669-11675.



- 394 21. Klemme J-H, Chyla I, Preuss M. 1980. Dissimilatory nitrate reduction by strains of the  
395 facultative phototrophic bacterium *Rhodopseudomonas palustris*. FEMS Microbiol Lett  
396 9:137-140.
- 397 22. McEwan AG, Greenfield AJ, Wetzstein HG, Jackson JB, Ferguson SJ. 1985. Nitrous  
398 oxide reduction by members of the family *Rhodospirillaceae* and the nitrous oxide  
399 reductase of *Rhodopseudomonas capsulata*. J Bacteriol 164:823-30.
- 400 23. Rayyan A, Meyer T, Kyndt J. 2018. Draft whole-genome sequence of the purple  
401 photosynthetic bacterium *Rhodopseudomonas palustris* XCP. Microbiol Resour Announc  
402 7:e00855-18.
- 403 24. Richardson DJ, Bell LC, Moir JWB, Ferguson SJ. 1994. A denitrifying strain of  
404 *Rhodobacter capsulatus*. FEMS Microbiol Lett 120:323-8.
- 405 25. Perez JC, Groisman EA. 2009. Evolution of transcriptional regulatory circuits in bacteria.  
406 Cell 138:233-44.
- 407 26. Bergaust L, van Spanning RJM, Frostegard A, Bakken LR. 2012. Expression of nitrous  
408 oxide reductase in *Paracoccus denitrificans* is regulated by oxygen and nitric oxide  
409 through FnrP and NNR. Microbiol 158:826-834.
- 410 27. Chen J, Strous M. 2013. Denitrification and aerobic respiration, hybrid electron transport  
411 chains and co-evolution. Biochim Biophys Acta 1827:136-44.
- 412 28. Morris JJ, Lenski RE, Zinser ER. 2012. The Black Queen Hypothesis: Evolution of  
413 dependencies through adaptive gene loss. mBio 3:e00036-12.
- 414 29. Gordon GC, McKinlay JB. 2014. Calvin cycle mutants of photoheterotrophic purple  
415 nonsulfur bacteria fail to grow due to an electron imbalance rather than toxic metabolite  
416 accumulation. J Bacteriol 196:1231-7.
- 417 30. Rey FE, Oda Y, Harwood CS. 2006. Regulation of uptake hydrogenase and effects of  
418 hydrogen utilization on gene expression in *Rhodopseudomonas palustris*. J Bacteriol  
419 188:6143-6152.
- 420 31. Kim M-K, Harwood CS. 1991. Regulation of benzoate-CoA ligase in  
421 *Rhodopseudomonas palustris*. FEMS Microbiol Lett 83:199-203.
- 422 32. Huang JJ, Heiniger EK, McKinlay JB, Harwood CS. 2010. Production of hydrogen gas  
423 from light and the inorganic electron donor thiosulfate by *Rhodopseudomonas palustris*.  
424 Appl Environ Microbiol 76:7717-7722.
- 425 33. van Spanning RJ, De Boer AP, Reijnders WN, Westerhoff HV, Stouthamer AH, van der  
426 Oost J. 1997. FnrP and NNR of *Paracoccus denitrificans* are both members of the FNR  
427 family of transcriptional activators but have distinct roles in respiratory adaptation in  
428 response to oxygen limitation. Mol Microbiol 23:893-907.
- 429
